# Supplementary material for: Intra-nanogap controllable Au plates as efficient, robust, and reproducible surface-enhanced Raman scattering-active platforms
Source: Royal Society of Chemistry journal article supplement (doi:10.1039/c9ra01813a), 2019-01-01
Supplement: c9ra01813a1.pdf [file c9ra01813a1.pdf]

## Supplementary information

# Intra-Nanogap Controllable Au Plates as Efficient, Robust, and Reproducible Surface-Enhanced Raman Scattering- Active Platforms

Siyeong Yang,<sup>‡a</sup> Minjin Kim,<sup>‡a</sup> Sanghyeok Park,<sup>b</sup> Hongki Kim,<sup>c</sup> Jinyoung Jeong,<sup>d,e</sup> Juyeon Jung,<sup>c,d</sup> Eun-Kyung Lim,<sup>c,d</sup> Min-Kyo Seo,<sup>b</sup> Bongsoo Kim,<sup>\*a</sup> and Taejoon Kang<sup>\*c,d</sup>

<sup>a</sup>Department of Chemistry, KAIST, 291 Daehak-ro, Yuseong-gu, Daejeon 34141, Korea.

<sup>b</sup>Department of Physics, KAIST, 291 Daehak-ro, Yuseong-gu, Daejeon 34141, Korea.

<sup>c</sup>Bionanotechnology Research Center, 125 Gwahak-ro, Yuseong-gu, KRIBB, Daejeon 34141, Korea.

<sup>d</sup>Department of Nanobiotechnology, KRIBB School of Biotechnology, UST, 217 Gajeong-ro, Yuseong-gu, Daejeon 34113, Korea.

<sup>e</sup>Environmental Disease Research Center, 125 Gwahak-ro, Yuseong-gu, KRIBB, Daejeon 34141, Korea.

<sup>‡</sup>These authors contributed equally to this work.

Corresponding Author

\*E-mail: bongsoo@kaist.ac.kr (B.K.); kangtaejoon@kribb.re.kr (T.K.)

The enhancement factor (EF) of the porous plate was estimated using the equation:<sup>1</sup>

$$EF = (I_{\text{plate}}/N_{\text{plate}})/(I_{\text{normal}}/N_{\text{normal}})$$

where  $I_{\text{plate}}$  and  $N_{\text{plate}}$  are the intensity and the number of 4-ABT contributing to the SERS signals, respectively.  $I_{\text{normal}}$  and  $N_{\text{normal}}$  are the intensity and the numbers of 4-ABT contributing to the normal Raman signals, respectively.

As the peak intensity at  $1,141 \text{ cm}^{-1}$  for 4-ABT,  $I_{\text{plate}}$  and  $I_{\text{normal}}$  are 5270 and 24, respectively.  $N_{\text{plate}}$  and  $N_{\text{normal}}$  are the number of adsorbed 4-ABT on the porous plate and Si substrate within the laser spot size, respectively, and estimated as follows:<sup>2</sup>

$$N_{\text{plate}} = 7 \times (2 \times A/2 \times \pi \times d) / (0.39 \times 10^{-18}) = 56.1 \times 10^3$$

$$N_{\text{normal}} = 5 \times 10^{-6} \times 0.1 \times 6.02 \times 10^{23} \times \pi \times (A/2)^2/s^2 = 0.945 \times 10^{10}$$

where  $A$  is the laser spot size (1  $\mu\text{m}$ ),  $d$  is the thickness of porous region (100 nm), and  $s$  is the edge length of the Si substrate (5 mm). Finally, the estimated EF value was  $3.7 \times 10^7$ .

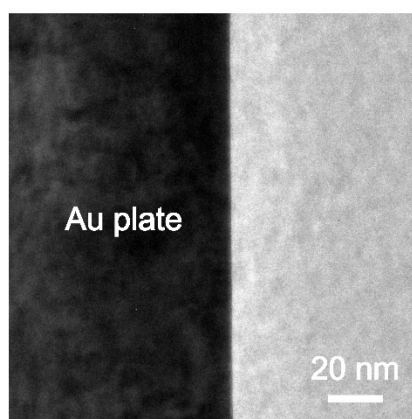

**Fig. S1** Cross-sectional TEM image of the Au nanoplate.

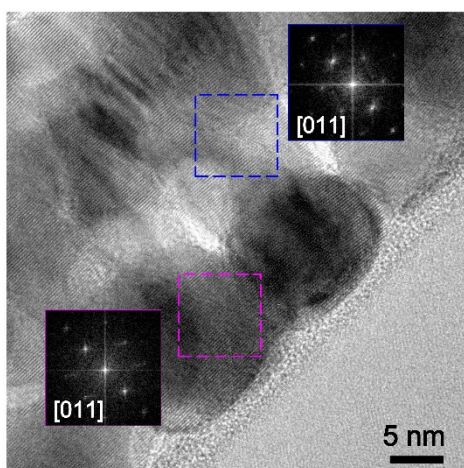

**Fig. S2** HR-TEM image of the nanoporous Au plate. Insets are FFT patterns of dashed line boxes.

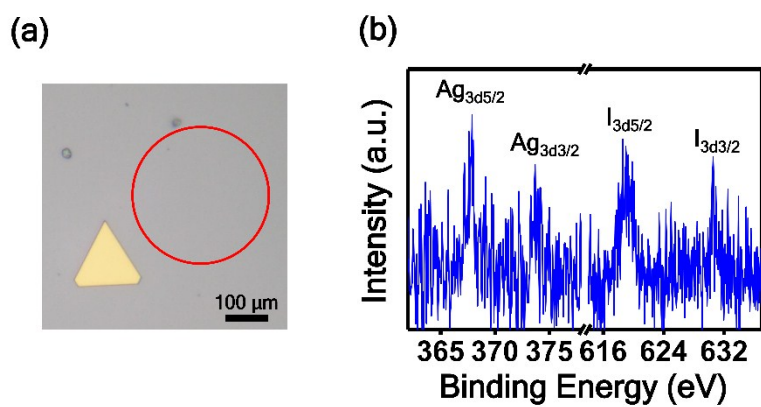

**Fig. S3** (a) Optical image of the AuAg alloy nanoplate on a substrate. (b) XPS spectra obtained from the red circle in (a).

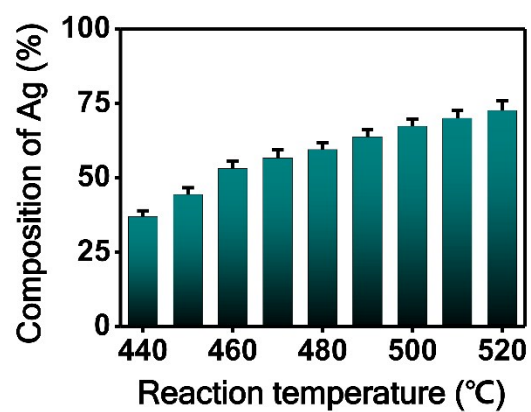

**Fig. S4** Composition of Ag on the surfaces of AuAg alloy nanoplates synthesized at temperatures ranging from 440 to 520°C with intervals of 10°C. The atomic ratio of Ag increases from 36.9 to 72.6% as the reaction temperature increases from 440 to 520°C. Data represent the mean plus standard deviation from twelve measurements.

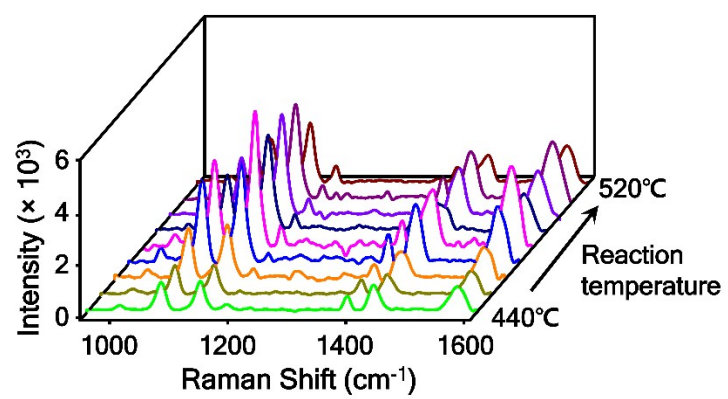

**Fig. S5** Full SERS spectra of 4-ABT measured on nanoporous Au plates depending on the reaction temperatures from 440 to 520°C.

## Reference

1. G. Eom, H. Kim, A. Hwang, H. Y. Son, Y. Choi, J. Moon, D. Kim, M. Lee, E. K. Lim and J. Jeong, *Advanced Functional Materials*, 2017, **27**, 1701832.
2. J. Qi, P. Motwani, M. Gheewala, C. Brennan, J. C. Wolfe and W. C. Shih, *Nanoscale*, 2013, **5**, 4105–4109.
